# Supplementary material for: Cataract surgery practice patterns worldwide: a survey
Source: PubMed Central journal article supplement — BMJ Open Ophthalmol. 2021 Jan 13;6(1):e000464. doi: 10.1136/bmjophth-2020-000464 (PMC7812090; doi:10.1136/bmjophth-2020-000464), 2021-01-13
Supplement: bmjophth-2020-000464supp001.pdf [file bmjophth-2020-000464supp001.pdf]

## Page 1

Enter some body text

---



1 Please enter the state where your Institution is located

Italy  
TOWNSVILLE  
Italy  
Abidjan  
Italy  
Rome  
United Kingdom  
Italy  
Spain  
Poland  
Canada  
Italy  
THESSALONIKI  
Belgium  
uK  
italy  
Russia  
Russia  
Russia  
British Columbia, Canada  
Mexico  
italy  
Mexico  
Italy  
italy  
Italy  
Italy  
california  
Italy  
italy  
PR  
japan  
Imperia, Italy  
Slovenia  
Italy  
JAPAN

Italy  
Slovenia  
Slovenia  
Assiut, Egypt  
Italy  
Italy  
Japan  
OSAKA  
Italy  
Japan Fukuoka  
Hospital Clinic of Barcelona  
Japan  
Italy  
Habana , Cuba  
JAPAN  
Japan  
italy  
Italy  
Italy  
Italy  
Italy  
Tamilnadu, India  
Napoli- Italy  
Milan Italy  
Italy  
Bologna  
Italy  
Riga, Latvia  
Japan  
Italy  
Italy  
Leipzig, Germany  
JAPAN  
Focus eye clinic  
Japan  
japan  
MELBOURNE Australia  
BRAZIL  
Japan

UK, North West

France

Italy

Greece

ITALY

JAPAN

japan

JAPAN

Athens, Greece

Japan

NY, NY USA

Aichi, Japan

JAPAN

san marino

Madrid

Italy

Westmead Hospital, Sydney

Mexico

Spain

italy

italy

Turkey

Japan

japan

São Paulo - Brazil

JAPAN

Zurich

Japan

Japan

Tokyo, Japan

London, England, UK

Japan

Thailand

Japan

Kawasaki city

Italy

Italy

Sydney, NSW

israel

Liguria

Italy

Tromsø, Norway

Poland

France , DIJON.

Israel

Italy

Japan

Italy

Pennsylvania

Italy

italy

UK

italy

Italy

Japan

JAPAN

Tennessee

Italy

Japan

Japan

Japan

Switzerland

Italy

JAPAN

JAPAN

Japan

Osaka, Japan

Japan

Italy

Italy

Italy

Italy e

Italy

Italy

Italy

Japan Hyogo

Italy

Italy

Italy  
japan  
Italy  
Italy  
Italy  
Italy  
Italy  
JAPAN  
Taiwan  
Japan  
Japan  
Japan  
JAPAN  
Japan  
Amman-jordan  
japan  
tokyo, japan  
Japan  
japon  
Japan  
Osaka, Japan  
Tasmania  
Rome  
King Khaled eye specialist hospital  
Italy, Piemonte  
Italy  
United Kingdom  
NJ  
Italy  
Italia  
Italy  
Italy  
Italy  
Italy  
Italy  
Italy  
Italy  
Bergamo  
UK  
u . . .

Italy

**2** Type of Institution (choose one)

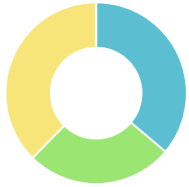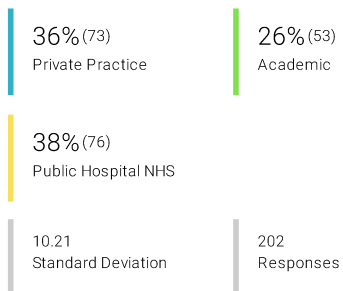

**3** How many cataract surgeries per year are performed in your Institution? (choose one)

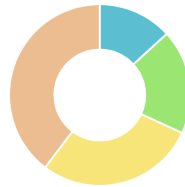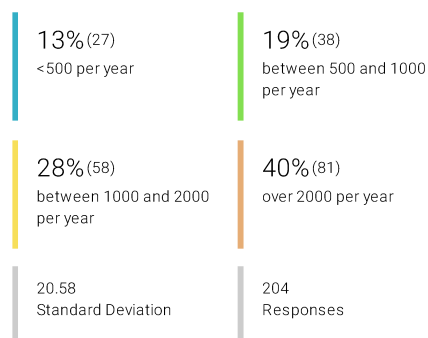

**4** How many ophthalmic surgeons (MDs) are present at the same time in the OR during cataract surgery? (choose one)

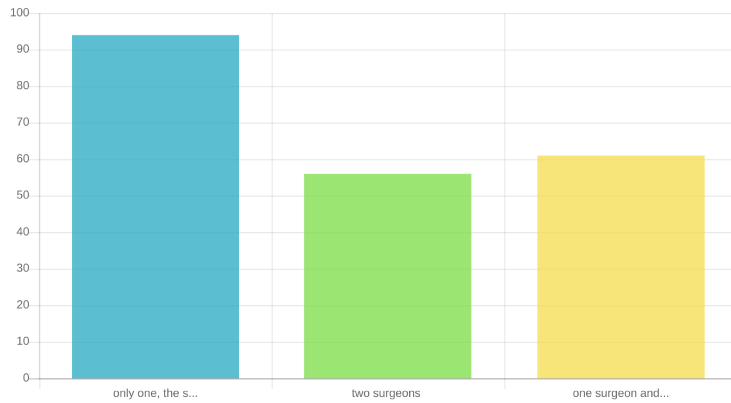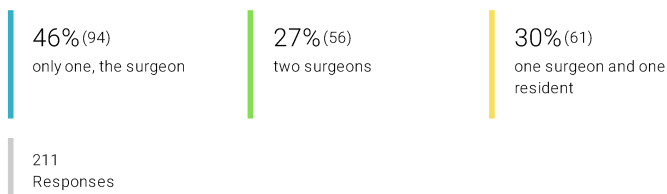



**5** How many nurses are present at the same in the OR during cataract surgery? (choose one)

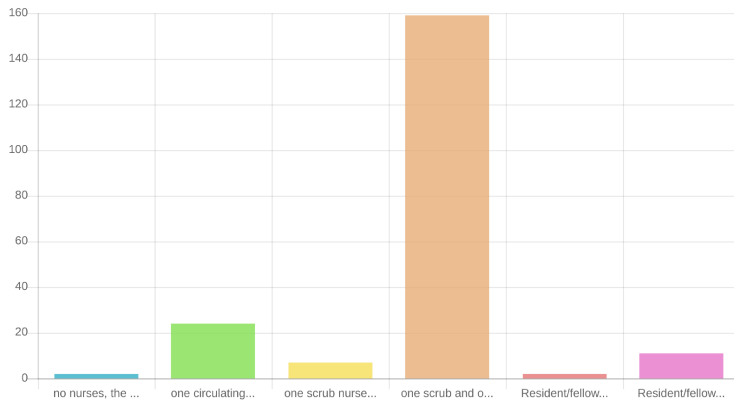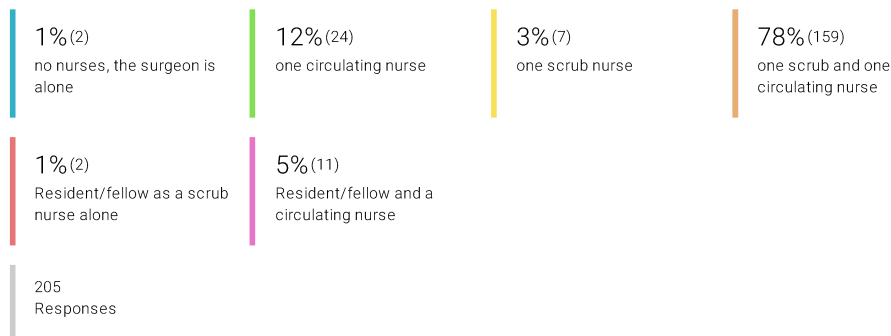

**6** type of anesthesia for uncomplicated routine cases (choose one)

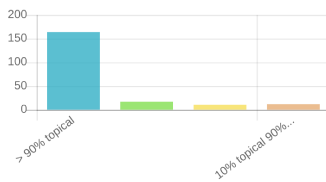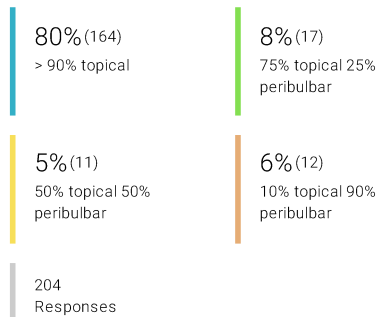

**7** is there an anesthesiologist? (Choose one)

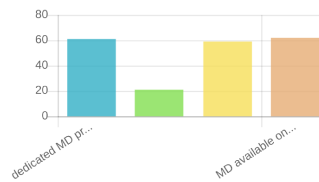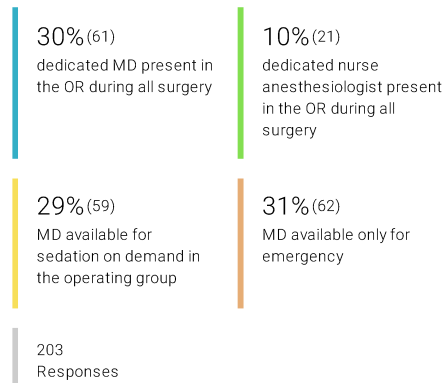

**8** Sedation (may choose more than one)

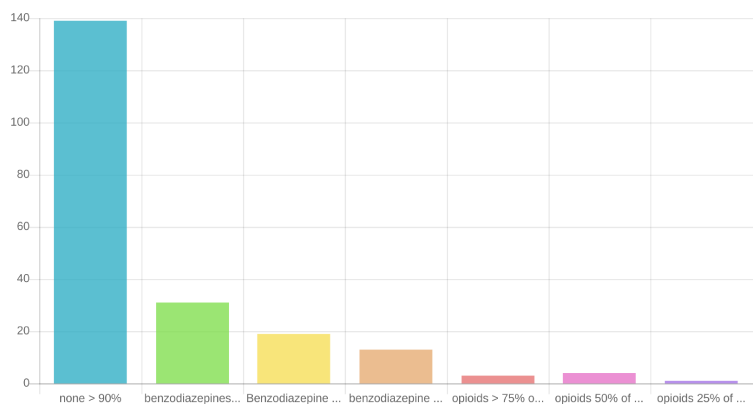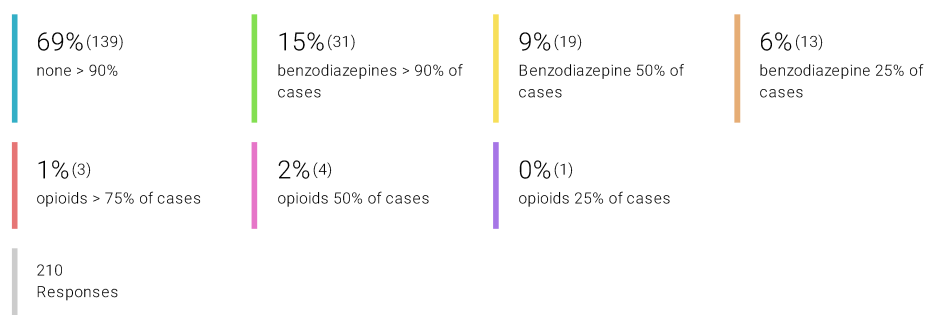

**9** does the patient have a vascular access during routine cataract surgery? (choose one)

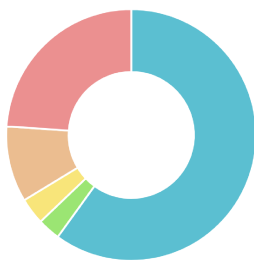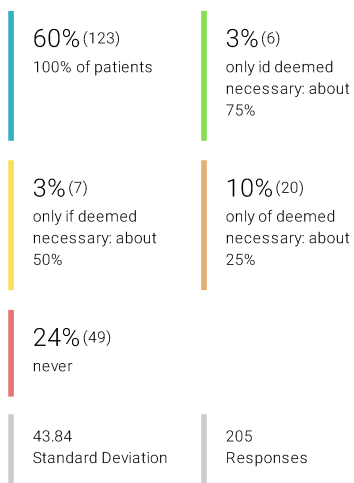

**10** Does the patient have continuous ECG monitoring during routine cataract surgery? (choose one)

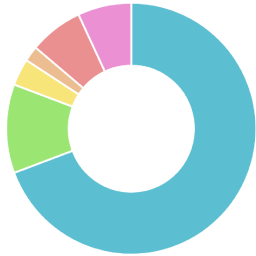

|                                                           |                                                          |
|-----------------------------------------------------------|----------------------------------------------------------|
| 69% (140)<br>100% of cases                                | 11% (23)<br>no, never                                    |
| 3% (7)<br>only in deemed necessary, roughly 75% of cases  | 2% (4)<br>only if deemed necessary, roughly 50% of cases |
| 7% (14)<br>only in deemed necessary, roughly 25% of cases | 7% (14)<br>only in deemed necessary, roughly 5% of cases |
| 47.93<br>Standard Deviation                               | 202<br>Responses                                         |

**11** Does the patient have continuous blood pressure monitoring during routine cataract surgery? (choose One)

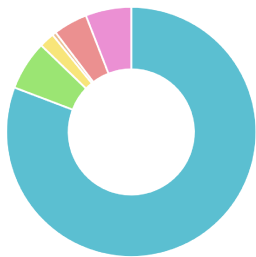

|                                                          |                                                          |
|----------------------------------------------------------|----------------------------------------------------------|
| 81% (164)<br>100% of cases                               | 6% (13)<br>no, never                                     |
| 2% (4)<br>only in deemed necessary, roughly 75% of cases | 0% (1)<br>only if deemed necessary, roughly 50% of cases |
| 4% (9)<br>only in deemed necessary, roughly 25% of cases | 6% (12)<br>only in deemed necessary, roughly 5% of cases |
| 58.36<br>Standard Deviation                              | 203<br>Responses                                         |

**12** pre-op ocular diagnostics ROUTINELY used: (may choose more than one)

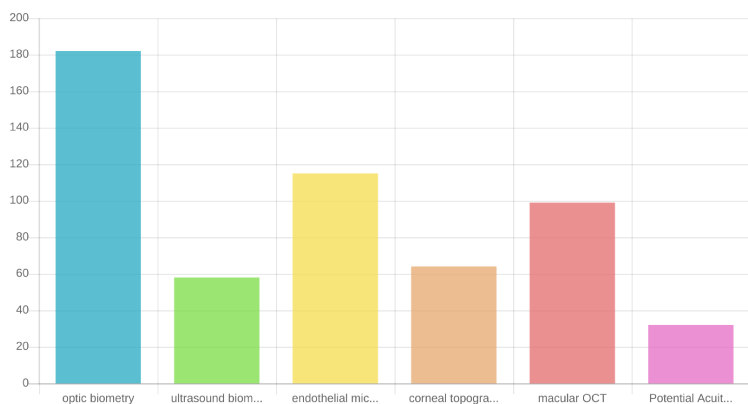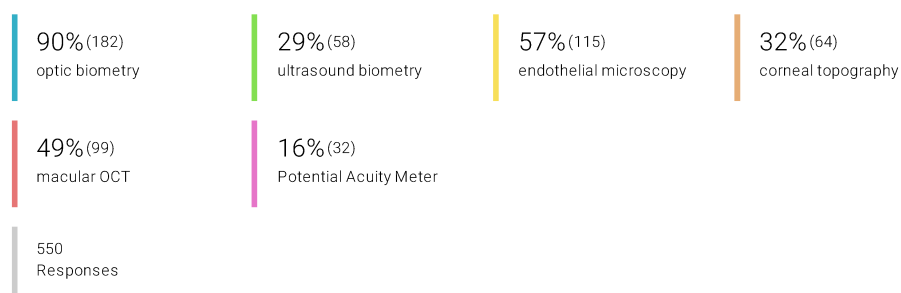

**13** Pre-operative testing (may choose more than one)

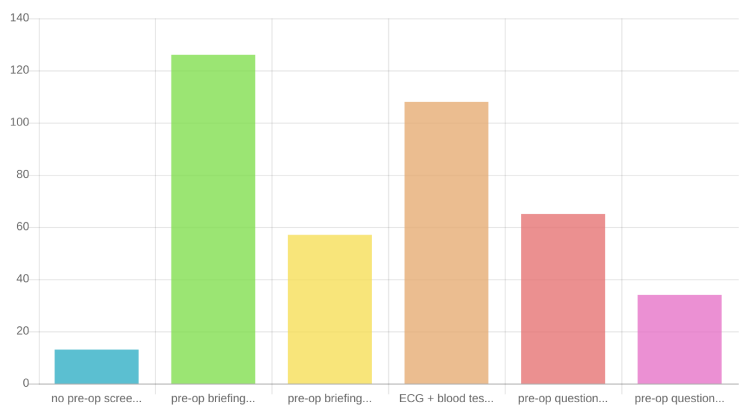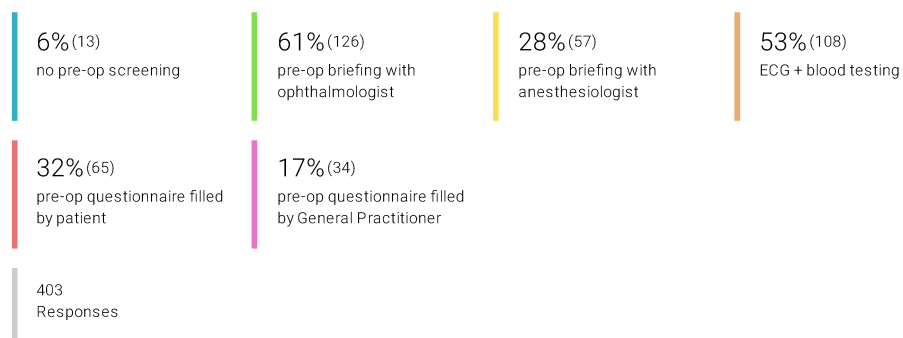

**14** Use of anti-coagulants / anti-aggregants (choose one)

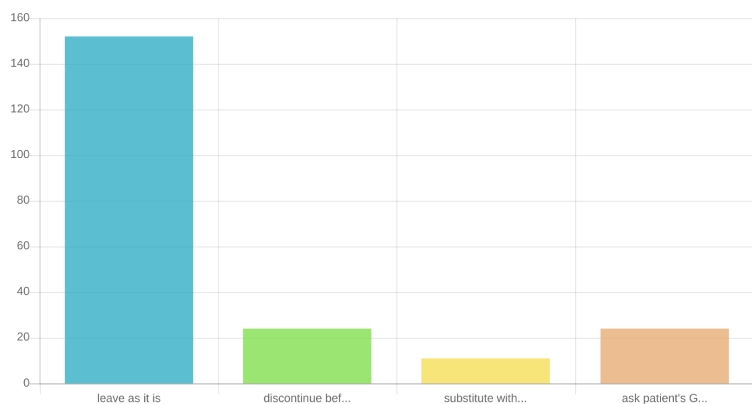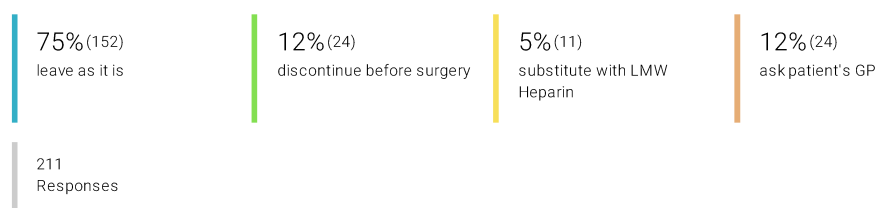

**15** Pre-operative prophylaxis (may choose more than one)

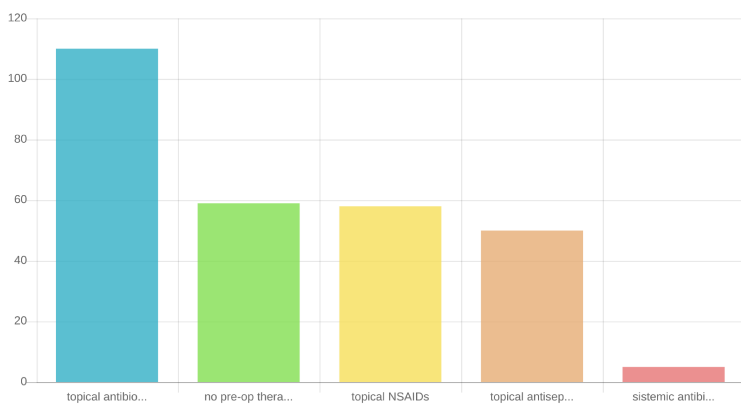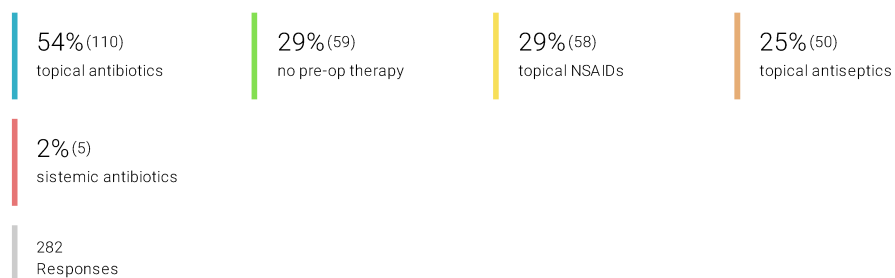

**16** Povidone iodine before surgery (choose one)

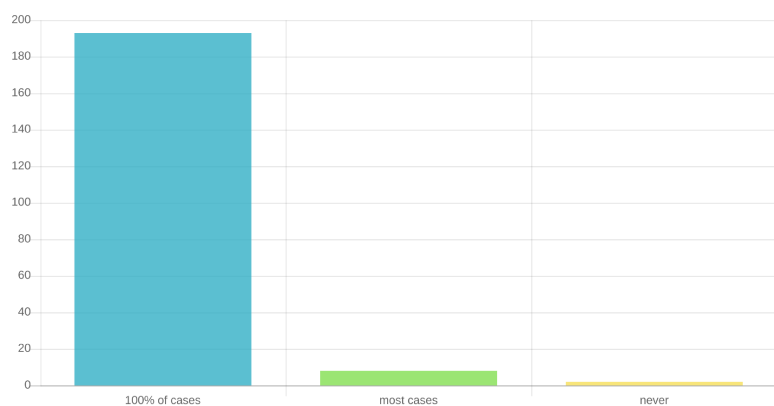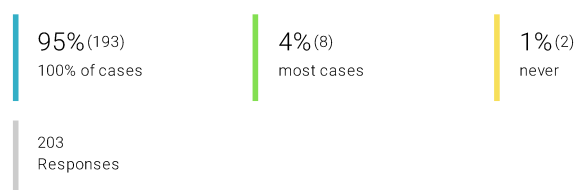

**17** Intra-op endophthalmitis prophylaxis at the end of surgery (may choose more than one)

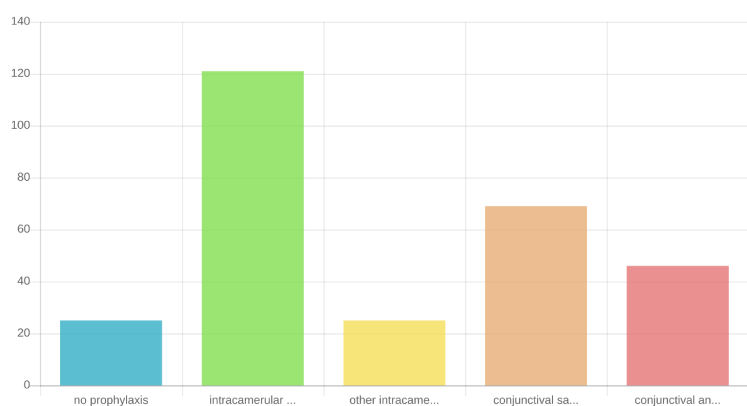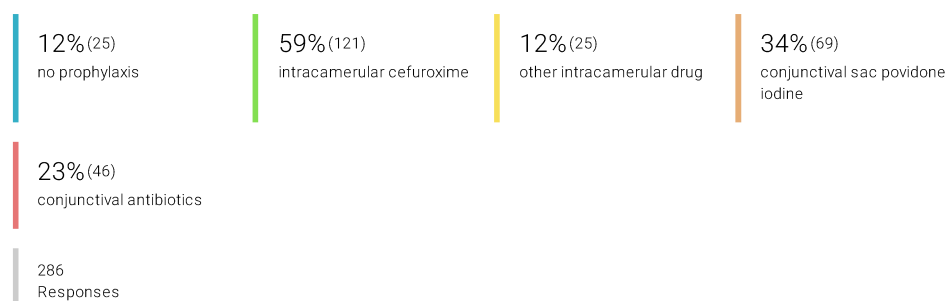

**18** Mark all materials changed with a sterile one after EACH and EVERY routine cataract surgery: (may choose more than one)

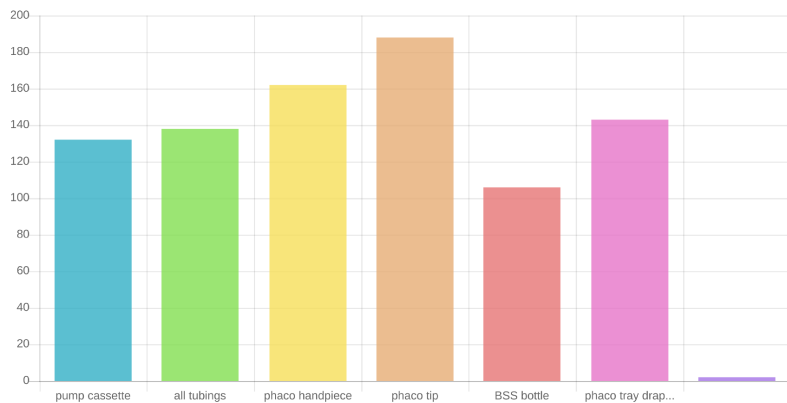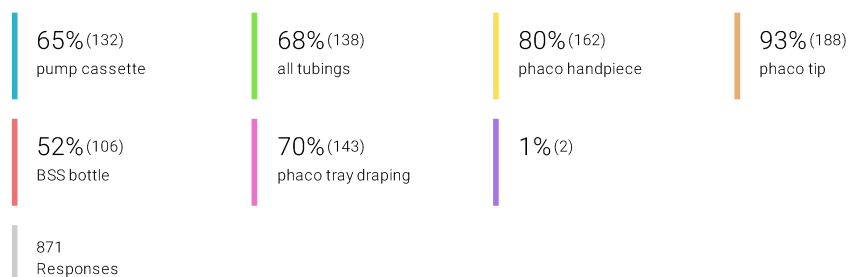

**19** Management of intra-operative systemic pressure spikes / anxiety (choose one)

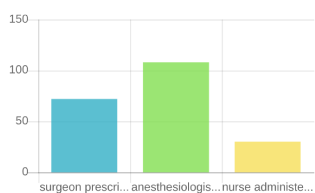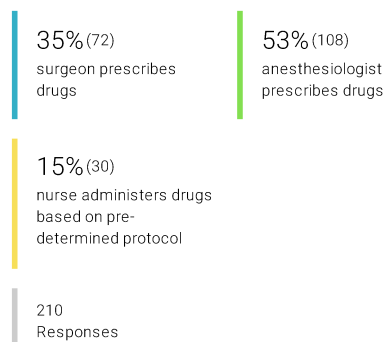

**20** Post-op patching (choose one)

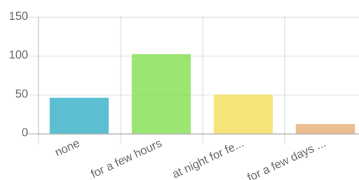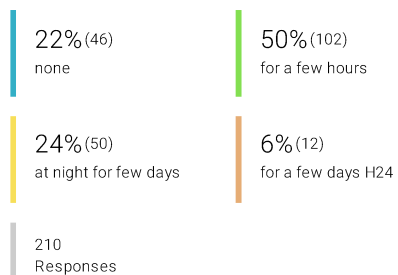

**21** Post-op restrictions (Choose one)

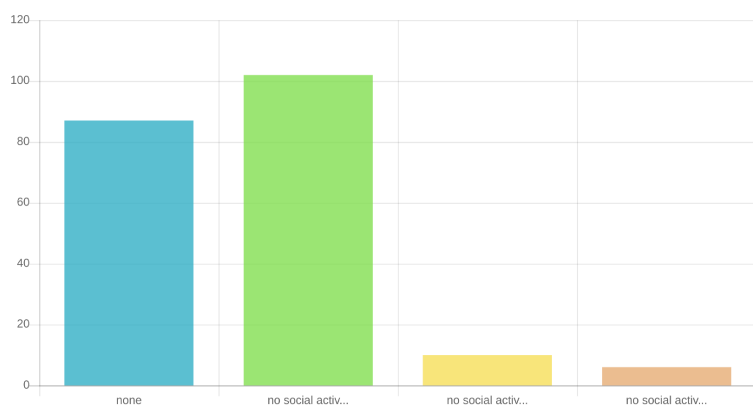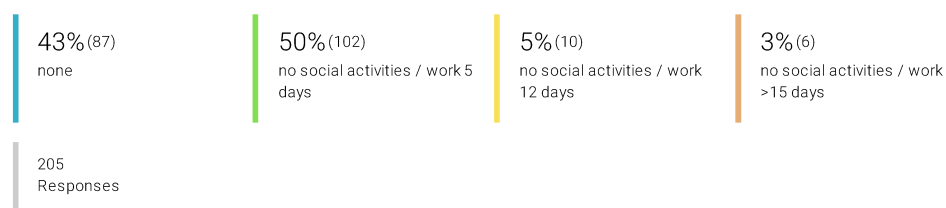

**22** Post-op therapy (choose one)

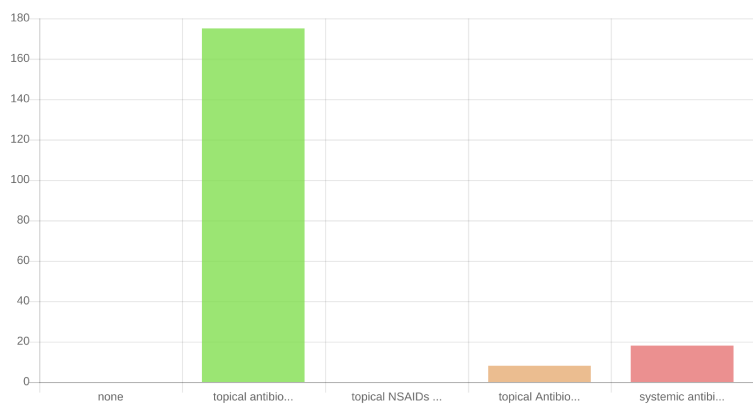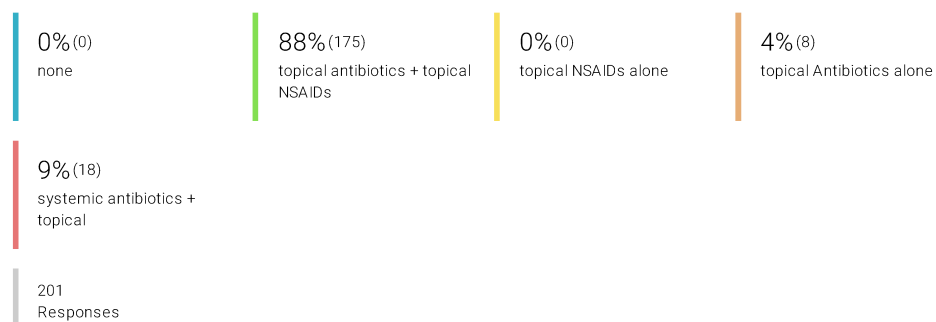



**23** Second eye (choose one)

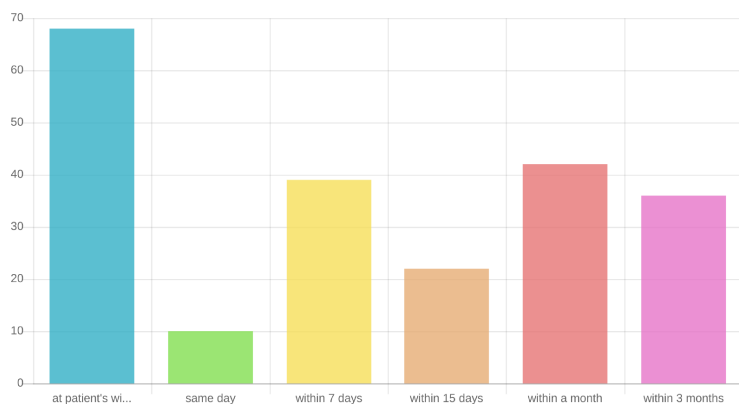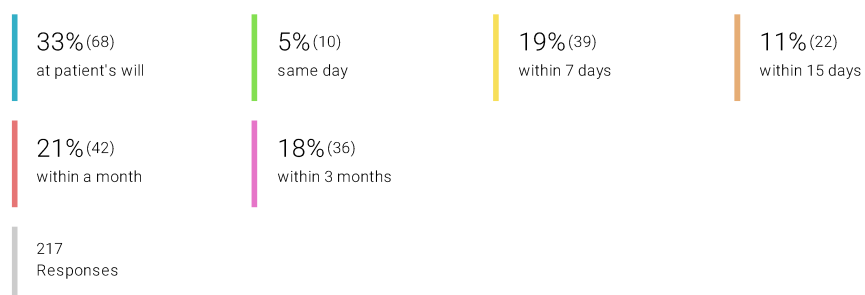

**24** length of stay within the premises of the Surgical Centre AFTER surgery for monitoring reason (choose one)

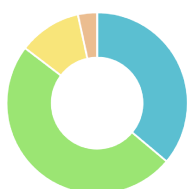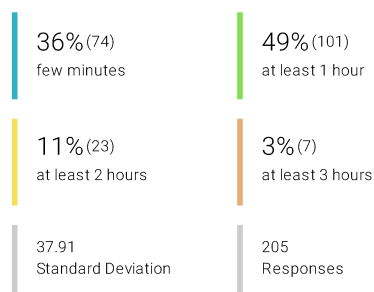

**25** Who discharges the patient from surgical center after surgery? (choose one)

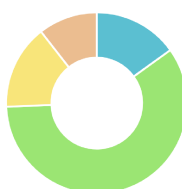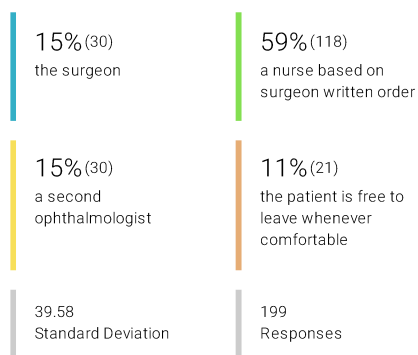

**26** post-op visit schedule is approximately (choose one)

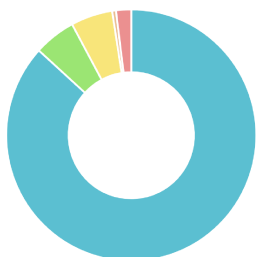

87% (177)  
day 1, 7, 30

5% (11)  
day 7, 30

5% (11)  
day 30

0% (1)  
patients makes an appointment based on his/her needs

2% (4)  
patient is instructed to call and make an appointment if he/she feels anything goes wrong

68.21  
Standard Deviation

204  
Responses

**27** Who sees the patient post routine cataract surgery? (choose one)

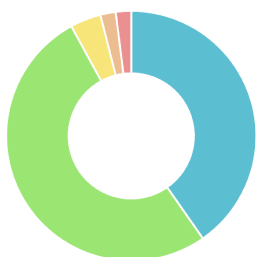

40% (81)  
always same surgeon

52% (104)  
any ophthalmologist on duty in the day of control visit

4% (8)  
referring ophthalmologist

2% (4)  
optometrist

2% (4)  
nurse

43.34  
Standard Deviation

201  
Responses

**28** if cost were NOT an issue would you like a dedicated anesthesiologist?  
(choose one)

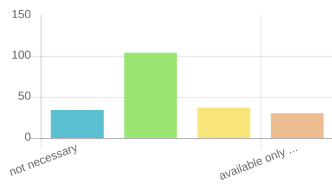

17% (34)  
not necessary

51% (104)  
yes

18% (37)  
available for sedation in  
the same floor is enough

15% (30)  
available only for  
emergency is enough
